# Supplementary material for: IL-17A contributes to perioperative neurocognitive disorders through blood-brain barrier disruption in aged mice
Source: Springer Nature journal article supplement (doi:10.1186/s12974-018-1374-3), 2018-11-30
Supplement: MOESM1 [file 16308084]

Table A: Training data (before shock) (totally 100s)

|                              | Con        | Sur        | Sur+anti-IL-17A | Sur+isotype |
|------------------------------|------------|------------|-----------------|-------------|
| freezing time (s) (1)        | 1.59       | 0.17       | 2.62            | 1.54        |
| freezing time (s) (2)        | 1.95       | 2.52       | 2.66            | 1.96        |
| freezing time (s) (3)        | 0.29       | 1.62       | 1.94            | 1.51        |
| freezing time (s) (4)        | 1.6        | 0.12       | 2.9             | 0.61        |
| freezing time (s) (5)        | 1.14       | 0.28       | 1.47            | 1.22        |
| freezing time (s) (6)        | 2.2        | 2.81       | 0.12            | 1.9         |
| freezing time (s) (7)        | 0.67       | 1.87       | 0.21            | 0.45        |
| freezing time (s) (8)        | 2.46       | 0.15       | 2.77            | 2.73        |
| freezing time (s) (9)        | 0.5        | 0.61       | 1.95            | 1.3         |
| freezing time (s) (10)       | 0.94       | 0.44       | 2.28            | 2.01        |
| freezing time (s) (11)       | 2.1        | 0.21       | 2.5             | 0.16        |
| freezing time (s) (12)       | 2.46       | 1.48       | 1.68            | 1.06        |
| freezing time (%) (mean±sem) | 1.492±0.22 | 1.023±0.29 | 1.925±0.27      | 1.371±0.21  |

Table B: Training data (after shock 1) (totally 100s)

|                              | Con       | Sur        | Sur+anti-IL-17A | Sur+isotype |
|------------------------------|-----------|------------|-----------------|-------------|
| freezing time (s) (1)        | 11.78     | 7.92       | 9.88            | 8.09        |
| freezing time (s) (2)        | 13.55     | 14.02      | 8.39            | 13.86       |
| freezing time (s) (3)        | 7.48      | 8.35       | 10.01           | 9.49        |
| freezing time (s) (4)        | 9.45      | 9.62       | 12.02           | 10.5        |
| freezing time (s) (5)        | 14.46     | 9.46       | 12.24           | 10.86       |
| freezing time (s) (6)        | 10.6      | 11.25      | 10.88           | 12.66       |
| freezing time (s) (7)        | 7.21      | 11.13      | 8.29            | 8.73        |
| freezing time (s) (8)        | 14.89     | 11.44      | 13.97           | 10.11       |
| freezing time (s) (9)        | 14.22     | 13.88      | 13.54           | 10.65       |
| freezing time (s) (10)       | 8.23      | 13.01      | 14.05           | 14.9        |
| freezing time (s) (11)       | 9.59      | 14.6       | 13.54           | 8.38        |
| freezing time (s) (12)       | 14.14     | 14.33      | 10.11           | 8.32        |
| freezing time (%) (mean±sem) | 11.3±0.84 | 11.58±0.69 | 11.41±0.61      | 10.55±0.64  |

Table C: Training data (after shock 2) (totally 100s)

|                              | Con        | Sur        | Sur+anti-IL-17A | Sur+isotype |
|------------------------------|------------|------------|-----------------|-------------|
| freezing time (s) (1)        | 24.91      | 24.81      | 17.09           | 25.57       |
| freezing time (s) (2)        | 20.4       | 26.58      | 20.36           | 25.92       |
| freezing time (s) (3)        | 26.94      | 18.98      | 26.54           | 22.21       |
| freezing time (s) (4)        | 26.76      | 22.91      | 24.41           | 26.58       |
| freezing time (s) (5)        | 18.23      | 26.78      | 25.33           | 19.87       |
| freezing time (s) (6)        | 19.23      | 22.17      | 20.19           | 19.09       |
| freezing time (s) (7)        | 21.53      | 19.5       | 24.44           | 18.4        |
| freezing time (s) (8)        | 24.03      | 20.83      | 23.68           | 26.08       |
| freezing time (s) (9)        | 22.52      | 19.33      | 24.97           | 24.57       |
| freezing time (s) (10)       | 24.57      | 24.98      | 22.36           | 25.06       |
| freezing time (s) (11)       | 18.54      | 26.08      | 20.93           | 26.3        |
| freezing time (s) (12)       | 23.84      | 26.87      | 26.01           | 23.42       |
| freezing time (%) (mean±sem) | 22.63±0.88 | 23.32±0.90 | 23.03±0.83      | 23.59±0.86  |

Table D: Testing data (totally 300s)

|                       | Con   | Sur   | Sur+anti-IL-17A | Sur+isotype |
|-----------------------|-------|-------|-----------------|-------------|
| freezing time (s) (1) | 65.25 | 44.37 | 51.54           | 49.41       |
| freezing time (s) (2) | 55.11 | 49.95 | 69.66           | 54.57       |
| freezing time (s) (3) | 64.08 | 38.88 | 62.01           | 34.92       |
| freezing time (s) (4) | 59.58 | 49.95 | 48.51           | 38.79       |
| freezing time (s) (5) | 62.82 | 52.74 | 62.82           | 35.73       |

|                                     |                   |                   |                   |                   |
|-------------------------------------|-------------------|-------------------|-------------------|-------------------|
| freezing time (s) (6)               | 52.02             | 47.16             | 56.52             | 43.98             |
| freezing time (s) (7)               | 60.03             | 46.71             | 50.64             | 45.69             |
| freezing time (s) (8)               | 69.99             | 41.25             | 53.82             | 49.5              |
| freezing time (s) (9)               | 58.71             | 35.94             | 64.05             | 44.28             |
| freezing time (s) (10)              | 72.57             | 47.94             | 54.21             | 35.04             |
| freezing time (s) (11)              | 66.09             | 57.12             | 53.88             | 30.84             |
| freezing time (s) (12)              | 79.02             | 52.17             | 57.69             | 45.72             |
| <u>freezing time (%) (mean±sem)</u> | <u>21.26±0.73</u> | <u>15.67±0.59</u> | <u>19.04±0.61</u> | <u>14.12±0.70</u> |
